# Supplementary material
Source: ML conference proceedings conference paper supplement (https://openreview.net/forum?id=qud5pDnpzo)
Supplement: supplementary_material [file attachment]

# VIP: A DIFFERENTIALLY PRIVATE FOUNDATION MODEL FOR COMPUTER VISION

**Anonymous authors**

Paper under double-blind review

## ABSTRACT

Artificial intelligence (AI) has seen a tremendous surge in capabilities thanks to the use of *foundation models* trained on internet-scale data. On the flip side, the uncurated nature of internet-scale data also poses significant privacy and legal risks, as they often contain personal information or copyrighted material that should not be trained on without permission. In this work, we propose as a mitigation measure a recipe to train foundation vision models via self-supervised learning with differential privacy (DP) guarantee. We identify masked autoencoders as a suitable learning algorithm that aligns well with DP-SGD, and train *ViP*—a Vision transformer with differential Privacy—under a strict privacy budget of  $\epsilon = 8$  on the LAION400M dataset. We evaluate the quality of representation learned by ViP using standard downstream vision tasks; in particular, ViP achieves a (non-private) linear probing accuracy of 55.7% on ImageNet, comparable to that of end-to-end trained AlexNet (trained and evaluated on ImageNet). Our result suggests that scaling to internet-scale data can be practical for private learning.

## 1 INTRODUCTION

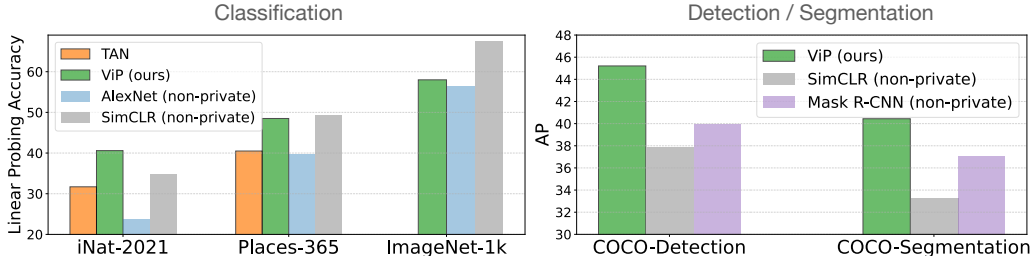

Figure 1: **(left)** Linear probing accuracies of TAN (Sander et al., 2022) (state-of-the-art DP training method), AlexNet (Krizhevsky et al., 2017), SimCLR (Chen et al., 2020a) and ViP—our DP-trained model with  $\epsilon = 8$ . ViP can achieve similar transfer learning result as SimCLR on iNat-2021 and Places-365, and achieves similar accuracy on ImageNet as end-to-end trained AlexNet. **(right)** Average precision (AP) evaluations of SimCLR (Chen et al., 2020a), Mask R-CNN (He et al., 2017) and ViP on MS-COCO. Our DP-trained model outperforms both SimCLR and Mask R-CNN.

Foundation models (e.g., GPT-3, SimCLR, CLIP, etc. (Brown et al., 2020; Chen et al., 2020a; Radford et al., 2021)) pre-trained on vast amounts of diverse unlabeled data through self-supervised learning (SSL) have emerged as an important building block for artificial intelligence (AI) systems (Bommasani et al., 2021). These foundation models enable downstream applications via fine-tuning, prompting, or training a simpler model on top of the learned representations to perform more specialized tasks, and have performed tremendously well on challenging benchmarks in both language and vision domains (Brown et al., 2020; Radford et al., 2021; Touvron et al., 2023).

Despite the widespread deployment of foundation models, there are significant privacy and legal risks of training these models on uncurated data that often contain personal information or copyrighted material. Although the training data for these models are considered *public* in most cases, some of the data may be sensitive; additionally, there are certain privacy and copyright laws that apply to model training even on such *public* data (Henderson et al., 2023). In addition, studies have shown that generative foundation models such as GPT-3 can sometimes regurgitate memorized information about individuals and licensed content from its training data when prompted to do so (Carlini et al.,

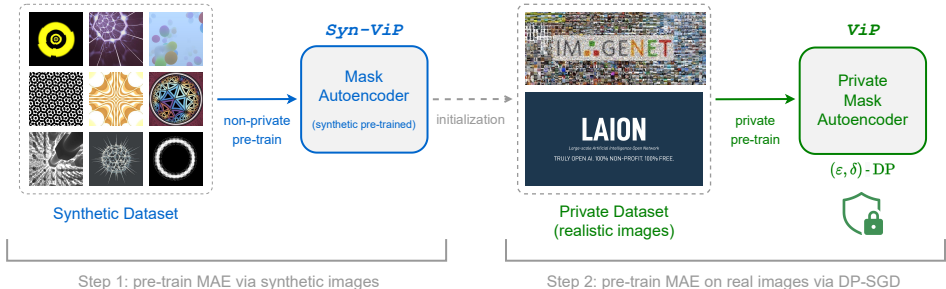

Figure 2: **How to pre-train differentially private transformers ( $ViP$ ) with synthetic data?** In Step 1, we first pre-train a MAE model on synthetic images with standard optimizers (e.g., SGD, AdamW). We denote this model by ( $Syn$ )- $ViP$ . In Step 2, we use the MAE model pre-trained on synthetic images as initialization, and then apply differential private optimizers (e.g., DP-SGD, DP-AdamW) to train a  $ViP$  model that satisfies  $(\epsilon, \delta)$ -DP.

2021). More recently, Meehan et al. (2023) showed that non-generative vision SSL models can also be probed to reveal sensitive information about individual samples in its training data when given partial information.

Given these risks, there is an urgent need to train foundation models that can adhere to relevant privacy and copyright laws. To this end, differential privacy (DP; Dwork et al. (2006)) seeks to limit the influence of individual training data points on the trained model, and hence has the potential to mitigate both privacy and copyright risks for sensitive information that is confined to a single or a few training examples (Henderson et al., 2023). For any model that can be trained using gradient-based optimization, DP-SGD (Song et al., 2013; Abadi et al., 2016) can be applied instead to ensure that the trained model satisfies the rigorous definition of DP. However, there are still significant technical challenges in DP-SGD training of large-scale foundation vision models:

1. Differentially private representation learning in general is a difficult problem. Tramer & Boneh (2020) showed that even handcrafted features can outperform feature learned by state-of-the-art DP-trained models, and attaining high-utility learned representations requires significantly more training data—much more than what is provided in typical supervised/curated datasets.
2. Combining self-supervised learning (SSL) with internet-scale *uncurated* datasets may seem like a natural approach to gain access to the large amount of data needed for DP training. However, most vision SSL training algorithms are based on *contrastive learning*, where the objective function depends on multiple samples in an entangled manner. This makes it difficult to perform the per-sample gradient computation needed in DP-SGD.
3. SSL training requires a much larger number of training epochs compared to supervised learning, which sharply increases the DP parameter  $\epsilon$ , leading to meaningless privacy guarantees.

In this paper, we describe a successful recipe for training differentially private large-scale foundation models via SSL. Firstly, we identify masked autoencoder (MAE; He et al. (2022)) as a promising SSL training algorithm that is amenable to DP-SGD. MAE uses an instance-separable loss function and does not require batch normalization, and hence per-sample gradients can be easily computed. We also show that it is tolerant to the large amount of Gaussian noise added in DP-SGD. Next, we demonstrate that MAE can effectively leverage synthetic datasets containing only programmatically-generated synthesized textures (Baradad et al., 2022) to warm-start the DP training process, significantly reducing the number of training epochs required to reach a high-utility model. The combination of these two ingredients forms a powerful DP training recipe for obtaining high-utility differentially private foundation vision models.

We implement this training recipe on the LAION400M dataset (Schuhmann et al., 2021). We show that the resulting model, which we call  $ViP$  (Vision transformer with differential Privacy), learns highly useful and transferable representations—*rivaling that of representation learned by SimCLR on ImageNet*—while providing a strong DP guarantee with  $\epsilon = 8$ . In Figure 1, we compare  $ViP$  with other private and non-private models in terms of downstream linear probing accuracy and fine-tuning accuracy for different image datasets:

- For iNat-2021 and Places-365 classification,  $ViP$  outperforms both TAN (Sander et al., 2022)—the previous SOTA for DP supervised training—and AlexNet (Krizhevsky et al., 2017), while matching or exceeding the performance of SimCLR pre-trained on ImageNet.

- On ImageNet, the linear probing accuracy of ViP matches that of end-to-end trained AlexNet<sup>1</sup>.
- On MS-COCO detection and segmentation, ViP outperforms both SimCLR pre-trained on ImageNet and Mask R-CNN.

Our experiments demonstrate that by scaling DP-SGD training to vast amounts of unlabeled data and using synthetic data to warm-start the model, we can attain high-utility foundation vision models under stringent privacy guarantees. Consequently, we hope that future work can continue to build on our successful recipe and further push the performance boundary of large-scale DP training.

## 2 BACKGROUND

**Differential privacy** (Dwork et al., 2014) is a mathematical framework for formal reasoning about information leakage through a private mechanism. A learning algorithm  $\mathcal{A}$  is said to be  $(\epsilon, \delta)$ -differentially private (denoted  $(\epsilon, \delta)$ -DP) if for all training datasets  $\mathcal{D}, \mathcal{D}'$  that differ<sup>2</sup> in a single training sample, we have:

$$P(\mathcal{A}(\mathcal{D}) \in S) \leq e^\epsilon P(\mathcal{A}(\mathcal{D}') \in S) + \delta \quad (1)$$

for all outcome sets  $S$ . More generally, equation 1 can be expressed as a statistical divergence  $D(\mathcal{A}(\mathcal{D})||\mathcal{A}(\mathcal{D}'))$  between the distribution of models trained on  $\mathcal{D}$  vs.  $\mathcal{D}'$ , with  $(\epsilon, \delta)$ -DP corresponding to the “hockey-stick” divergence (Sharma & Warsi, 2013). Another useful variant is Rényi differential privacy (RDP; (Mironov, 2017)), which uses the Rényi divergence  $D_\alpha$  (Rényi et al., 1961):  $\mathcal{A}$  is said to be  $(\alpha, \epsilon)$ -RDP if  $D_\alpha(\mathcal{A}(\mathcal{D})||\mathcal{A}(\mathcal{D}')) \leq \epsilon$ . Moreover, RDP can be converted to DP via the following (Balle et al., 2020): if  $\mathcal{A}$  is  $(\alpha, \epsilon_\alpha)$ -RDP then it is also  $(\epsilon, \delta)$ -DP with

$$\epsilon = \epsilon_\alpha + \log \left( \frac{\alpha - 1}{\alpha} \right) - \frac{\log \delta + \log \alpha}{\alpha - 1}. \quad (2)$$

**DP-SGD training.** Abadi et al. (2016) showed that stochastic gradient descent (SGD)—the quintessential learning algorithm—can be made differentially private by perturbing the per-iteration gradient with Gaussian noise. The modified SGD update with gradient perturbation (often referred to as *DP-SGD*) is given by:

$$\theta_{t+1} = \theta_t - \frac{\eta_t}{|\mathcal{B}_t|} \left( \sum_{\mathbf{x} \in \mathcal{B}_t} \text{clip}_C(\nabla_{\theta} \ell(\mathbf{x}; \theta)|_{\theta=\theta_t}) + \mathcal{N}(0, \sigma^2 C^2 \mathbf{I}) \right), \quad (3)$$

where  $\eta_t$  is the learning rate,  $\mathcal{B}_t$  is the sampled batch,  $\sigma > 0$  is the noise multiplier, and  $\text{clip}_C$  is the operation that clips the per-sample gradient norm to at most  $C > 0$ . It can be shown that this update procedure is  $(\alpha, \epsilon_\alpha)$ -RDP for some computable  $\epsilon_\alpha$  (Mironov et al., 2019). The end-to-end learning algorithm by running  $T$  iterations of SGD is thus  $(\alpha, T\epsilon_\alpha)$ -RDP via composition (Mironov, 2017), and a conversion to  $(\epsilon, \delta)$ -DP can be obtained using equation 2. Such privatization mechanism—per-sample clipping and injecting noise—can be easily integrated with other first-order optimization algorithms such as Adam (Kingma & Ba, 2014) and AdamW (Loshchilov & Hutter, 2017).

**Self-supervised learning (SSL)** has emerged as a prominent approach for scaling up the training of machine learning models to large-scale unlabeled datasets. Restricting our attention to the vision domain, SSL pre-trained models generalize effectively across a wide range of transfer learning downstream tasks such as classification, instance segmentation and object detection (Chen et al., 2020b; Bommasani et al., 2021), especially under the scenario of limited downstream training data. Vision SSL methods can be broadly categorized as either *joint embedding-based learning* (JE) (Chen et al., 2020a; He et al., 2020; Grill et al., 2020; Zbontar et al., 2021; Chen & He, 2021) or *reconstruction-based learning* (REC) (Bao et al., 2021; Xie et al., 2022; He et al., 2022). JE-based approaches design objective functions so that all views (or image augmentations) of the same sample have similar embeddings, while views of different samples have different embeddings. As a result, most JE-based approaches *require* a batch containing multiple samples in order to define the objective function. On the other hand, REC-based approaches aim to optimize models to reconstruct image inputs in the pixel space based on partially masked inputs, which promotes the model to learn compressed representations that can generalize well.

<sup>1</sup>The model is sourced from the PyTorch website and is end-to-end trained with supervised learning.

<sup>2</sup>We adopt the removal notion of adjacency, *i.e.*,  $\mathcal{D}' = \mathcal{D} \cup \mathbf{z}$  for some  $\mathbf{z}$  and vice versa.

**Related work.** Recently, an expanding body of literature has emerged on scaling DP training to large-scale datasets and models in both NLP and vision domains. In NLP, a series of works (Anil et al., 2021; Yu et al., 2021; Li et al., 2022a) showed that by combining public pre-training and scaling up the training batch size, it is possible to fine-tune the pre-trained language model to achieve reasonable downstream performance. In computer vision, Kurakin et al. (2022) first attempted to scale DP training of convolutional neural networks (ResNets) to ImageNet. De et al. (2022) further improved the performance of Kurakin et al. (2022) with a Normalizer-Free ResNet architecture and an improved training recipe. More recently, Sander et al. (2022) proposed a more efficient hyperparameter tuning method for DP training that led to state-of-the-art performance on ImageNet. It is worth noting that all these works on DP-trained computer vision models focus on training supervised models.

### 3 RECIPE FOR TRAINING DP FOUNDATION VISION MODELS

In this work, we identify a successful recipe for training differentially private foundation vision models. Training DP foundation models, or in general any deep learning model with a large number of parameters, poses a significant challenge due to the large amount of injected noise— $\mathcal{N}(0, \sigma^2 C^2 \mathbf{I})$  in equation 3. Indeed, current state-of-the-art differentially private deep learning models even underperform linear models with handcrafted features when  $\epsilon$  is small (De et al., 2022; Tramer & Boneh, 2020). We propose two effective techniques that reduce the magnitude of noise injected during training while attaining strong  $(\epsilon, \delta)$ -DP guarantees: **1.** Scaling up the number of training samples via self-supervised learning with masked autoencoder; and **2.** Facilitating faster training by warm-starting the model with weights pre-trained on synthetic samples.

#### 3.1 DIFFERENTIAL PRIVATE SSL WITH MASK AUTOENCODER

Most existing works on differentially private training (De et al., 2022; Sander et al., 2022; Bu et al., 2022) focus on supervised learning, which inherently restricts the quantity of training samples that can be utilized. In contrast, self-supervised learning approaches unlock the use of (albeit uncured) internet-scale training data that can be on the order of billions of samples, which can potentially satisfy the amount of data needed for DP training of high-utility models (Tramer & Boneh, 2020).

On the other hand, most existing SSL training approaches do not align with requirements in DP-SGD training. For example, SimCLR (Chen et al., 2020a) requires a mini-batch of samples in order to compute the contrastive loss; BYOL (Grill et al., 2020) computes per-sample loss but it utilizes batch normalization (BN) (Ioffe & Szegedy, 2015) in the model architecture, resulting in each loss depending on a mini-batch of training samples.<sup>3</sup> Therefore, it is challenging to perform the per-sample gradient clipping as described in equation 3. Among various types of SSL methods, we identify reconstruction-base learning with masked autoencoders (MAE) (He et al., 2022) as one of the most suitable SSL approaches for training DP foundation vision models. The training objective  $L_{\text{MAE}}(\theta)$  in MAE is defined as:

$$L_{\text{MAE}}(\theta) := \frac{1}{n} \sum_{i=1}^n \ell_{\text{MSE}}(g \circ \psi(\text{mask}(\mathbf{x}_i); \theta), \mathbf{x}_i) = \frac{1}{n} \sum_{i=1}^n \ell(\mathbf{x}_i; \theta), \quad (4)$$

where  $n$  is the number of training samples,  $\mathbf{x}_i \in \mathbb{R}^{C \times H \times W}$  is the input of the  $i$ -th training image ( $C$ -number of channels,  $H$ -height,  $W$ -width),  $\text{mask}(\cdot)$  is a function that mask out a fraction of the image,  $\psi : \mathbb{R}^{C \times H \times W} \rightarrow \mathbb{R}^d$  is the encoder and  $g : \mathbb{R}^d \rightarrow \mathbb{R}^{C \times H \times W}$  is the decoder. We use  $\theta$  to denote the trainable parameters of the  $\psi$  and  $g$ , and use  $\ell_{\text{MSE}}$  to denote the mean squared error (MSE) loss defined on the pixel space, *i.e.*,  $\ell_{\text{MSE}}(\mathbf{x}_1, \mathbf{x}_2) = \|\mathbf{x}_1 - \mathbf{x}_2\|_F^2$ . Similar to He et al. (2022), we apply vision transformers (Dosovitskiy et al., 2020) to instantiate the encoder and decoder maps. As shown in equation 4, the training objective can be decomposed into  $n$  individual losses, and each individual loss  $\ell(\mathbf{x}_i; \theta)$  only depends on the  $i$ -th training sample  $\mathbf{x}_i$  and does not require the label of  $\mathbf{x}_i$ . Therefore, we can compute per-sample gradient  $\nabla_{\theta} \ell(\mathbf{x}_i; \theta)$  and perform per-sample gradient clipping without modifying the MAE training.

<sup>3</sup>Subsequent work by Richemond et al. (2020) demonstrated that BN can be substituted with group normalization by carefully modifying the model architecture. However, we have observed that the design of exponential moving averaged online network in BYOL can result in dynamic instability during training, which poses challenges in the context of DP training.

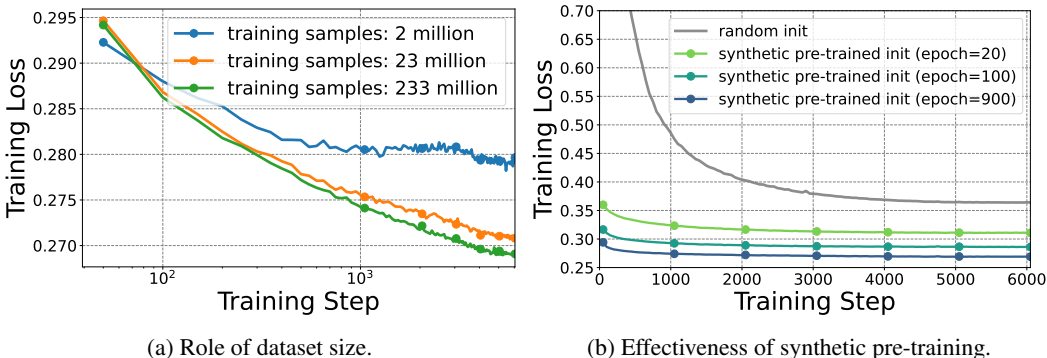

Figure 3: (a). We vary the number of training samples  $n$  with the  $(\epsilon, \delta_n)$ -DP guarantee ( $\delta_n = 1/2n$ ), and compare the training losses of MAE-DP. By scaling up the training dataset size, we can consistently improve the ViP training under the same  $\epsilon$ -DP budget. (b). Compared to ViP training from random initialization, we can significantly speed up the ViP training by leveraging the synthetic pre-trained MAE model as initialization.

By leveraging the self-supervised MAE training paradigm, we can now significantly scale up the training data size for DP SSL pre-training. Dataset scaling can effectively reduce the magnitude of noise in DP-SGD while maintaining the same  $(\epsilon, \delta_n)$ -DP guarantee, where  $\delta_n = 1/2n$ . As shown in Figure 3a, we investigate the impact of injected noise in ViP training by keeping all training hyperparameters the same except for the number of training samples<sup>4</sup>. With more training samples, the magnitude of the injected noise  $\sigma$  becomes smaller. We find that when the noise magnitude is large, the training loss cannot be further optimized after certain number of training steps. In contrast, smaller magnitude of noise (as a result of larger training dataset) facilitates faster optimization of the training loss in comparison to larger noise scenarios. Importantly, the optimization trajectory is stable despite the presence of noise, allowing the MAE model to learn useful features.

### 3.2 SYNTHETIC PRE-TRAINING ENABLES FASTER DP TRAINING FOR ViP

Non-private training of SSL models often require a significant number of training epochs, much larger than what is required in supervised learning (Chen et al., 2020a; He et al., 2022; Balestrieri et al., 2023). This creates an additional challenge for DP training since the number of training iterations  $T$  directly impacts the privacy guarantee. Indeed, as mentioned in Section 2, DP-SGD with  $T$  iterations is  $(\alpha, T\epsilon_\alpha)$ -RDP. Consequently, naively applying DP-SGD to MAE training results in an unfavorable privacy-utility trade-off.

Fortunately, He et al. (2019) demonstrated that using pre-trained initialization enables much faster model convergence compared to random initialization. However, in light of our discussion in Section 1, it is critical that the pre-training data does not contain any private information, even if the data is deemed “public”. One promising alternative is pre-training on programmatically-generated synthetic images (Kataoka et al., 2020; Baradad et al., 2022), which was shown to achieve competitive downstream performance compared to pre-training on natural images. Doing so allows the MAE to learn spatial structure in the transformer modules (Jelassi et al., 2022) without expending any privacy budget for the natural image data. More importantly, synthetic pre-training does not carry any privacy risk, and legal risk is limited to obtaining proper license for the synthetic image generation code.

Thus, to accelerate ViP training, we pre-train the model on synthetic images generated using the Shaders21k tool developed in Baradad et al. (2022). Figure 2 shows samples of synthetic images generated by the tool. In Figure 3b, we compare the ViP training with and without synthetic pre-trained initialization. Notably, training ViP with synthetic pre-trained weights converges significantly faster than those with random initialized weights. Increasing the synthetic pre-training from 20 to 900 epochs further improves convergence for ViP training. Interestingly, as shown in Figure 1, MAE trained on the synthetic dataset already outperforms existing state-of-the-art DP-trained models (De et al., 2022; Sander et al., 2022) under our transfer learning evaluation, which shows that DP training on datasets even as large as ImageNet does not learn sufficiently expressive features (see Table 1).

<sup>4</sup>We maintain the same batch size across various data size settings while modifying the noise multiplier  $\sigma$ . Consequently, as the data size increases, the corresponding  $\sigma$  values decrease.

### 3.3 OUR PROPOSED APPROACH

We now summarize our approach for DP foundation vision model training (also see Figure 2):

#### DP-MAES – DP Masked Autoencoder with Synthetic Pre-training

- **Step 1:** *Synthetic pre-training for initialization.* Pre-train mask autoencoder on the synthetic dataset with non-private optimizers.
- **Step 2:** *DP training with synthetic initialization.* Apply the synthetic pre-trained model as initialization and train mask autoencoder on a large-scale natural image dataset (e.g., LAION400M) with DP-SGD. The DP guarantee then applies to the natural image dataset.

It is worth mentioning that our proposed approach offers flexibility in the selection of both SSL training methods and synthetic datasets. For example, developing better synthetic datasets or more effective SSL learning method can further push the performance of the final DP foundation model.

## 4 EVALUATION

We evaluate the effectiveness of our training recipe by applying it to the LAION400M dataset to train our private foundation vision model: **ViP**. We consider various downstream tasks in order to demonstrate the quality and transferability of its learned representation. Furthermore, we compare ViP to previous state-of-the-art DP-trained models as well as widely adopted non-privately trained models, and find that ViP significantly improves SOTA for DP training on downstream transfer tasks (Section 4.2) and even outperforms non-private models on several challenging datasets. In addition to assessing the performance of ViP on non-private downstream tasks, in Section B.3, we also evaluate the ViP model via DP fine-tuning on ImageNet-1K, which shows a notable improvement of 10%+ absolute top-1 accuracy compared to previous SOTA (Sander et al., 2022). For additional experimental results on ViP, see Appendix B.

### 4.1 EVALUATION SETUP

Our implementation uses PyTorch, along with the functorch package (Horace He, 2021) for computation of per-sample gradients and the opacus package (Yousefpour et al., 2021) for privacy accounting. See Appendix A for additional implementation details.

**Datasets.** We use 1.05 million samples generated using the Shader21k (Baradad et al., 2022) tool as our synthetic pre-training dataset, and the LAION400M (Schuhmann et al., 2021) as our private pre-training dataset for the ViP model<sup>5</sup>. We evaluate ViP and baseline models via *non-private* linear probing and fine-tuning on the following downstream classification datasets: ImageNet-1K (Deng et al., 2009), Places-365 and Places-205 (Zhou et al., 2014), iNaturalist-2021 (Van Horn et al., 2021), CIFAR-100 (Krizhevsky et al., 2009), Caltech101 (Fei-Fei et al., 2006), and Aircraft (Maji et al., 2013). The input images are resized and center-cropped to 224×224 resolution. We also evaluate using MS-COCO instance segmentation and object detection (Lin et al., 2014), and semantic segmentation with the ADE20K dataset (Zhou et al., 2019) (in Appendix B.1).

**Model architecture.** Following He et al. (2022), we use vision transformer (ViT) (Dosovitskiy et al., 2020) to instantiate the masked autoencoder models. The default MAE-encoder has 12 transformer blocks and width 768, and the default MAE-decoder has 4 transformer blocks and width 512. We denote this MAE model as MAE-base. We also consider MAE models with different model sizes, including MAE-Nano, MAE-Tiny, MAE-Small and MAE-Large in Section 4.3.

**Optimization and hyperparameters for (DP-)MAE training.** We use AdamW (Loshchilov & Hutter, 2017) for training MAE – both for synthetic pre-training and differentially private MAE pre-training. When evaluating pre-trained models in downstream tasks, we apply LARS (You et al., 2017) for linear probing and AdamW for fine-tuning. For MAE training, we set the masking ratio to 75%. In terms of DP training, we set  $\epsilon = 8.0$  and  $\delta = 1/2n$  by default for training  $(\epsilon, \delta)$ -DP model. We set the clipping parameter  $C = 0.1$ , sampling ratio  $q = 81920/n$ , and noise parameter  $\sigma = 0.5$ .

<sup>5</sup>Some of the links in LAION400M are now broken since its initial release, and the version we use contains ~233 million real images. We use LAION233M to denote this subsampled version of LAION400M.

Table 1: Linear probing evaluation on downstream classification. We compare *ViP* with both private pre-training (DP-NFNet and TAN) and non-private pre-training (AlexNet and SimCLR) baselines, as well as the synthetically pre-trained MAE model: *(Syn)-ViP*. *ViP* consistently outperforms all private baselines, and has similar transfer learning performance as non-private SimCLR pre-trained on ImageNet-1K. (<sup>‡</sup>All models except for *(Syn)-ViP* and *ViP* are pre-trained on ImageNet-1K, giving them an unfair advantage for the linear probing evaluation on ImageNet-1K.)

| Model               | DP? | SSL? | Pre-train dataset | # pre-train samples | ImageNet-1K <sup>‡</sup> | Places-365   | Places-205   | iNat-2021    |
|---------------------|-----|------|-------------------|---------------------|--------------------------|--------------|--------------|--------------|
| DP-NFNet            | ✓   | ✗    | ImageNet-1k       | ~1 million          | 45.3%                    | 40.1%        | 39.2%        | 28.2%        |
| TAN                 | ✓   | ✗    | ImageNet-1k       | ~1 million          | 49.0%                    | 40.5%        | 38.2%        | 31.7%        |
| AlexNet             | ✗   | ✗    | ImageNet-1k       | ~1 million          | 56.5%                    | 39.8%        | 35.1%        | 23.7%        |
| SimCLR              | ✗   | ✓    | ImageNet-1k       | ~1 million          | 67.5%                    | 46.8%        | 49.3%        | 34.8%        |
| <i>(Syn)-ViP</i>    | ✓   | ✓    | Shaders21k        | ~1 million          | 49.8%                    | 43.2%        | 45.8%        | 32.4%        |
| <i>ViP-LAION</i>    | ✓   | ✓    | LAION             | ~233 million        | <b>55.7%</b>             | <b>46.1%</b> | <b>48.5%</b> | <b>38.1%</b> |
| <i>ViP-ImageNet</i> | ✓   | ✓    | ImageNet-1k       | ~1 million          | 52.6%                    | 44.3%        | 46.5%        | 34.2%        |

Table 2: Fine-tuning evaluation on few-shot downstream classification. *ViP* consistently outperforms both TAN (private) and AlexNet (non-private), as well as *(Syn)-ViP* by a large margin. Performance does fall short compared to non-private SimCLR pre-trained on ImageNet-1K despite having access to more than 100× more data, suggesting that there is much room for improvement for private learning.

| Model            | Aircraft      |               |               | Caltech-101   |               |               | CIFAR-100     |               |               |
|------------------|---------------|---------------|---------------|---------------|---------------|---------------|---------------|---------------|---------------|
|                  | 10-shot       | 20-shot       | 30-shot       | 5-shot        | 10-shot       | 30-shot       | 5-shot        | 10-shot       | 30-shot       |
| AlexNet          | 23.27%        | 34.47%        | 41.35%        | 64.70%        | 73.57%        | 81.40%        | 29.74%        | 36.31%        | 49.28%        |
| SimCLR           | 38.79%        | 56.90%        | 64.90%        | 81.70%        | 89.11%        | 94.51%        | 49.93%        | 60.18%        | 71.84%        |
| TAN              | 22.84%        | 37.93%        | 46.01%        | 49.32%        | 66.42%        | 77.87%        | 21.28%        | 27.78%        | 42.35%        |
| <i>(Syn)-ViP</i> | 21.79%        | 46.85%        | 58.45%        | 60.51%        | 76.21%        | 88.48%        | 27.62%        | 38.96%        | 55.84%        |
| <i>ViP</i>       | <b>31.62%</b> | <b>53.05%</b> | <b>64.26%</b> | <b>68.05%</b> | <b>79.03%</b> | <b>88.90%</b> | <b>30.73%</b> | <b>40.95%</b> | <b>57.52%</b> |

**Existing methods for comparison.** We compare with existing state-of-the-art DP-trained models: DP-NFNet (De et al., 2022) and TAN (Sander et al., 2022), both of which are trained differentially privately on ImageNet-1K using supervised learning. In addition, we present the results of several widely used *non-private* models that are pre-trained on ImageNet-1K including AlexNet (Krizhevsky et al., 2017) (supervised learning-based) and SimCLR (Chen et al., 2020a) (SSL-based) for reference. To measure the effectiveness of DP pre-training compared to synthetic pre-training, we also evaluate the model pre-trained on synthetically generated Shader21k data, denoted **(Syn)-ViP**. We also compare *ViP* with the non-private MAE model pre-trained on the same datasets and summarize the results in Table 7 (Appendix B.4).

## 4.2 TRANSFER LEARNING EVALUATION

To show that *ViP* learns high-quality representations from its training data, we evaluate its transfer learning performance on a suite of image classification tasks using both linear probing and few-shot fine-tuning. For linear probing, we use all the training samples in the downstream task training set to learn the linear classifier, while freezing all layers except for the final linear layer. For few-shot fine-tuning, we randomly select  $K$  training samples from each class and fine-tune the entire model. It is worth noting that both linear probing and fine-tuning evaluations are done using *non-private* training; our pre-trained *ViP* model only satisfies  $(\epsilon, \delta)$ -DP on the LAION233M dataset.

**Linear probing.** Table 1 shows the linear probing results on four large-scale image classification datasets: ImageNet-1K, Places-365/205 and iNat-2021. The most suitable baselines in this setting are DP-NFNet and TAN, both of which are DP-trained on ImageNet-1K with  $\epsilon = 8$  and represent previous state-of-the-art in large-scale DP pre-training. First of all, we find that MAE pre-training only on synthetic images (*i.e.*, *(Syn)-ViP*) is already comparable or even outperforms SOTA DP pre-trained models. After differentially privately pre-training on LAION233M, *ViP* effectively improves the performance of *(Syn)-ViP* on all datasets by a large margin.

Importantly, *ViP* even outperforms *non-private* SimCLR pre-trained on ImageNet-1K on all datasets (except ImageNet-1k itself because SimCLR does not need to transfer), and achieves similar perfor-

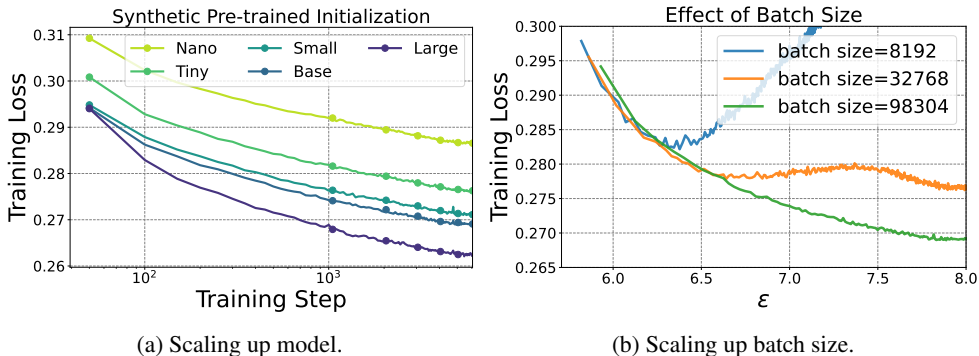

Figure 4: **(Left)** Effect of scaling up model size on MAE training loss. Larger models attain lower training loss despite the larger magnitude of noise added during DP-SGD. **(Right)** Effect of batch size on MAE training loss while fixing  $\epsilon$ . A large batch size is necessary for convergence.

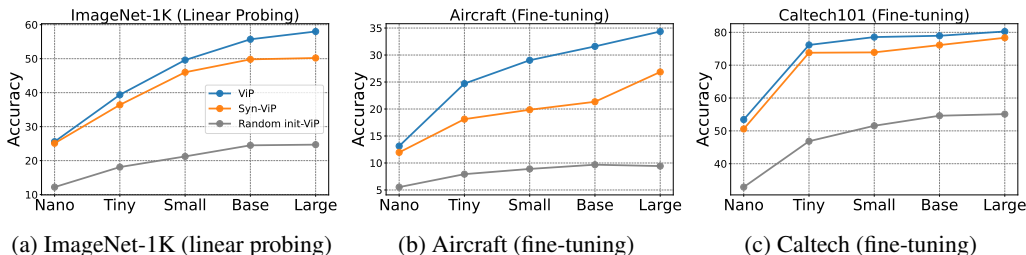

Figure 5: Effect of scaling up model size on downstream performance. ViP with synthetic pre-training (blue line) benefits substantially from larger model size. In comparison, ViP with random initialization (gray line) does not benefit as much from model scaling, as the difference in performance between MAE-Large and MAE-Nano is considerably smaller.

mance as end-to-end non-privately trained AlexNet. To the best of our knowledge, this is the first time a DP-trained model can achieve similar performance on vision benchmark datasets as that of a mainstream (albeit older) model, which demonstrates the potential of our training recipe.

**Few-shot fine-tuning.** Table 2 shows the few-shot fine-tuning results on Aircraft, Caltech-101 and CIFAR-100. Similar to the linear probing result, (Syn)-ViP already outperforms TAN—the previous SOTA DP-trained model—across all evaluation settings except for 10-shot classification on Aircraft. Next, we find that ViP can largely improve upon (Syn)-ViP when the number of samples per class is small, attaining SOTA performance in all evaluation settings. ViP also achieves better performance than non-privately pre-trained AlexNet by a large margin, but falls short against non-private SimCLR despite having access to more than  $100\times$  training data. Thus, our result can be viewed as both a positive and a negative result, showing that there is still a long way to go for private learning before matching the performance of mainstream vision models across the board.

### 4.3 SCALING PROPERTIES

We now study scaling properties of our training recipe, including scaling up (1) the model size, (2) the training set size, and (3) the previously known successful recipe of scaling up batch size.

**Scaling up model size.** DP-SGD training is generally unfavorable to large models because the noise magnitude increases with model size. Interestingly, we show that model performance in fact improves by scaling up model size using our training recipe. Specifically, we change the MAE-encoder size while fixing the MAE-decoder size, resulting in five different model sizes from MAE-Nano to MAE-Large; Table 4 in Appendix A.1) gives architecture details including number of parameters. All models are trained to satisfy the same  $(\epsilon, \delta)$ -DP guarantee with  $\epsilon = 8$ .

Figure 4a plots the training curve for the different-sized models. At the beginning of DP training, due to synthetic pre-training, a larger MAE model can learn more expressive features and hence the MAE training loss on LAION233M decreases as model size increases. Intriguingly, the training losses of MAE-Small/Base/Large are similar at the beginning, but larger ViT models achieve faster convergence *despite the large amount of DP noise*. Although similar observations on larger models



Table 3: Ablation studies on the effect of dataset size and batch size. The first row shows the result of (Syn)-ViP, which is the common starting point for all models in the subsequent rows. Difference in performance compared to (Syn)-ViP is shown in parentheses. See text for details. ( $\ddagger$  represents linear probing evaluation and  $\diamond$  represents 10-shot fine-tuning evaluation.)

| Model     | Batch Size | # Train data | Noise $\sigma$ | ImageNet-1K $\ddagger$ | Places-365 $\ddagger$ | iNat-2021 $\ddagger$ | Aircraft $\diamond$ | CIFAR-100 $\diamond$ |
|-----------|------------|--------------|----------------|------------------------|-----------------------|----------------------|---------------------|----------------------|
| (Syn)-ViP | -          | -            | -              | 49.8%                  | 43.2%                 | 32.4%                | 21.8%               | 39.0%                |
| ViP       | 98,304     | 2M           | 2.50           | 52.6% (+2.8%)          | 44.8% (+1.6%)         | 37.0% (+4.6%)        | 29.1% (+7.3%)       | 39.9% (+0.9%)        |
| ViP       | 98,304     | 23M          | 0.66           | 53.7% (+3.9%)          | 45.2% (+2.0%)         | 37.6% (+5.2%)        | 31.5% (+9.7%)       | 40.5% (+1.5%)        |
| ViP       | 98,304     | 233M         | 0.48           | 55.7% (+5.9%)          | 46.1% (+2.9%)         | 38.1% (+5.7%)        | 31.6% (+9.8%)       | 41.0% (+2.0%)        |
| ViP       | 8,192      | 233M         | 0.41           | 43.9% (-5.9%)          | 41.0% (-2.2%)         | 27.6% (-4.8%)        | 15.0% (-6.8%)       | 39.2% (+0.2%)        |
| ViP       | 32,768     | 233M         | 0.45           | 53.0% (+3.2%)          | 45.1% (+1.9%)         | 36.2% (+3.8%)        | 30.0% (+8.2%)       | 40.3% (+1.3%)        |
| ViP       | 98,304     | 233M         | 0.48           | 55.7% (+5.9%)          | 46.1% (+2.9%)         | 38.1% (+5.7%)        | 31.6% (+9.8%)       | 41.0% (+2.0%)        |

converge faster have also been described in the context of non-private learning (Li et al., 2020), the fact that we observe the same phenomenon in Figure 4a suggests that model scaling can be effective even for *private* learning under our training recipe.

Figure 5 shows the effect of model scaling on downstream linear probing and fine-tuning performance. In particular, the effective reduction in training loss shown in Figure 4a indeed translates to better downstream performance, with larger ViP model consistently achieving better accuracy without modifications to the training process. Moreover, comparing ViP with synthetic pre-training (blue line) vs. random initialization (gray line) shows that synthetic pre-training is crucial for unlocking this scaling behavior: the difference in performance between MAE-Large and MAE-Nano is much smaller when the model is randomly initialized.

**Scaling up dataset size.** Next, we investigate the effect of scaling up the number of training samples in ViP training. We vary the training dataset size from 2M to 23M to 233M while choosing the magnitude of injected noise  $\sigma$  so that models trained on different dataset sizes satisfy  $(\epsilon, \delta_n)$ -DP guarantee with  $\epsilon = 8$  and  $\delta_n = 1/2n$ , where  $n$  is the number of training samples. Table 3 shows downstream evaluation results. The first row corresponds to the synthetically pre-trained ViP model and rows 2-4 correspond to DP-trained ViP models with different dataset sizes. As expected, a larger pre-training dataset size results in a higher-utility ViP model. For example, scaling from 2M to 233M gives 3.1% linear probing accuracy gain on ImageNet-1K (from 52.6% to 55.7%). Given that the collection of large labeled datasets is very costly in practice, these results highlight the significance of self-supervised learning in DP training.

**Scaling up batch size.** Scaling up the training batch size is a known effective way to achieve strong performance in DP supervised learning (Li et al., 2022a). We analyze the effect of batch size in training ViP models and show that the same observation holds for DP self-supervised learning. We consider three different batch size  $B \in \{8192, 32768, 98304\}$ , and keep the computational budget—number of per-sample gradient computation—the same for all batch sizes. We then select the noise  $\sigma$  such that models trained with different batch size satisfy the same  $(\epsilon, \delta)$ -DP. As shown in Figure 4b, we find that larger batch size leads to better stability in the training process as well as faster convergence under the same computational budget. Rows 5-7 in Table 3 demonstrate that larger batch size also translates to a substantial improvement in ViP’s transfer learning performance.

## 5 DISCUSSION AND FUTURE WORK

We developed a recipe for DP self-supervised learning of foundation vision models, and showed that the resulting model—ViP—can achieve downstream performance matching or exceeding that of mainstream non-private models such as SimCLR (with ImageNet-1K pre-training). Our work shows the potential of scaling DP training to internet-scale unlabeled datasets and presents several opportunities for future work. **1.** Our recipe adapted MAE to DP-SGD training with minimal modifications. It may be possible to design more specialized SSL training algorithms that conform to the requirements of DP-SGD and are more effective at learning useful representations. **2.** Multi-modal SSL is generally more effective than single-modality pre-training due to the additional supervision from cross-modal alignment (Mu et al., 2022). However, existing multi-modal SSL methods are mostly based on contrastive learning (e.g., CLIP (Radford et al., 2021), SLIP (Mu et al., 2022) and FLIP (Li et al., 2022b)) and do not admit per-sample gradient computation. Recent work (Huang et al., 2023) investigated how to fine-tune CLIP on vision-language tasks with DP guarantee. Additional work may be needed to adapt these methods to DP-SGD training.

## REFERENCES

- Martin Abadi, Andy Chu, Ian Goodfellow, H Brendan McMahan, Ilya Mironov, Kunal Talwar, and Li Zhang. Deep learning with differential privacy. In *Proceedings of the 2016 ACM SIGSAC conference on computer and communications security*, pp. 308–318, 2016.
- Rohan Anil, Badih Ghazi, Vineet Gupta, Ravi Kumar, and Pasin Manurangsi. Large-scale differentially private bert. *arXiv preprint arXiv:2108.01624*, 2021.
- Randall Balestriero, Mark Ibrahim, Vlad Sobal, Ari S. Morcos, Shashank Shekhar, Tom Goldstein, Florian Bordes, Adrien Bardes, Grégoire Mialon, Yuandong Tian, Avi Schwarzschild, Andrew Gordon Wilson, Jonas Geiping, Quentin Garrido, Pierre Fernandez, Amir Bar, Hamed Pirsiavash, Yann LeCun, and Micah Goldblum. A cookbook of self-supervised learning. 2023.
- Borja Balle, Gilles Barthe, Marco Gaboardi, Justin Hsu, and Tetsuya Sato. Hypothesis testing interpretations and renyi differential privacy. In *International Conference on Artificial Intelligence and Statistics*, pp. 2496–2506. PMLR, 2020.
- Hangbo Bao, Li Dong, Songhao Piao, and Furu Wei. Beit: Bert pre-training of image transformers. *arXiv preprint arXiv:2106.08254*, 2021.
- Manel Baradad, Richard Chen, Jonas Wulff, Tongzhou Wang, Rogerio Feris, Antonio Torralba, and Phillip Isola. Procedural image programs for representation learning. *Advances in Neural Information Processing Systems*, 35:6450–6462, 2022.
- Rishi Bommasani, Drew A Hudson, Ehsan Adeli, Russ Altman, Simran Arora, Sydney von Arx, Michael S Bernstein, Jeannette Bohg, Antoine Bosselut, Emma Brunskill, et al. On the opportunities and risks of foundation models. *arXiv preprint arXiv:2108.07258*, 2021.
- Tom Brown, Benjamin Mann, Nick Ryder, Melanie Subbiah, Jared D Kaplan, Prafulla Dhariwal, Arvind Neelakantan, Pranav Shyam, Girish Sastry, Amanda Askell, et al. Language models are few-shot learners. *Advances in neural information processing systems*, 33:1877–1901, 2020.
- Zhiqi Bu, Jialin Mao, and Shiyun Xu. Scalable and efficient training of large convolutional neural networks with differential privacy. *arXiv preprint arXiv:2205.10683*, 2022.
- Nicholas Carlini, Florian Tramer, Eric Wallace, Matthew Jagielski, Ariel Herbert-Voss, Katherine Lee, Adam Roberts, Tom B Brown, Dawn Song, Ulfar Erlingsson, et al. Extracting training data from large language models. In *USENIX Security Symposium*, volume 6, 2021.
- Ting Chen, Simon Kornblith, Mohammad Norouzi, and Geoffrey Hinton. A simple framework for contrastive learning of visual representations. In *International conference on machine learning*, pp. 1597–1607. PMLR, 2020a.
- Ting Chen, Simon Kornblith, Kevin Swersky, Mohammad Norouzi, and Geoffrey E Hinton. Big self-supervised models are strong semi-supervised learners. *Advances in neural information processing systems*, 33:22243–22255, 2020b.
- Xinlei Chen and Kaiming He. Exploring simple siamese representation learning. In *Proceedings of the IEEE/CVF conference on computer vision and pattern recognition*, pp. 15750–15758, 2021.
- Ekin D Cubuk, Barret Zoph, Dandelion Mane, Vijay Vasudevan, and Quoc V Le. Autoaugment: Learning augmentation policies from data. *arXiv preprint arXiv:1805.09501*, 2018.
- Soham De, Leonard Berrada, Jamie Hayes, Samuel L Smith, and Borja Balle. Unlocking high-accuracy differentially private image classification through scale. *arXiv preprint arXiv:2204.13650*, 2022.
- Jia Deng, Wei Dong, Richard Socher, Li-Jia Li, Kai Li, and Li Fei-Fei. Imagenet: A large-scale hierarchical image database. In *2009 IEEE conference on computer vision and pattern recognition*, pp. 248–255. Ieee, 2009.

- Alexey Dosovitskiy, Lucas Beyer, Alexander Kolesnikov, Dirk Weissenborn, Xiaohua Zhai, Thomas Unterthiner, Mostafa Dehghani, Matthias Minderer, Georg Heigold, Sylvain Gelly, et al. An image is worth 16x16 words: Transformers for image recognition at scale. *arXiv preprint arXiv:2010.11929*, 2020.
- Cynthia Dwork, Frank McSherry, Kobbi Nissim, and Adam Smith. Calibrating noise to sensitivity in private data analysis. In *Theory of Cryptography: Third Theory of Cryptography Conference, TCC 2006, New York, NY, USA, March 4-7, 2006. Proceedings 3*, pp. 265–284. Springer, 2006.
- Cynthia Dwork, Aaron Roth, et al. The algorithmic foundations of differential privacy. *Found. Trends Theor. Comput. Sci.*, 9(3-4):211–407, 2014.
- Li Fei-Fei, Robert Fergus, and Pietro Perona. One-shot learning of object categories. *IEEE transactions on pattern analysis and machine intelligence*, 28(4):594–611, 2006.
- Jean-Bastien Grill, Florian Strub, Florent Altché, Corentin Tallec, Pierre Richemond, Elena Buchatskaya, Carl Doersch, Bernardo Avila Pires, Zhaohan Guo, Mohammad Gheshlaghi Azar, et al. Bootstrap your own latent—a new approach to self-supervised learning. *Advances in neural information processing systems*, 33:21271–21284, 2020.
- Kaiming He, Georgia Gkioxari, Piotr Dollár, and Ross Girshick. Mask r-cnn. In *Proceedings of the IEEE international conference on computer vision*, pp. 2961–2969, 2017.
- Kaiming He, Ross Girshick, and Piotr Dollár. Rethinking imagenet pre-training. In *Proceedings of the IEEE/CVF International Conference on Computer Vision*, pp. 4918–4927, 2019.
- Kaiming He, Haoqi Fan, Yuxin Wu, Saining Xie, and Ross Girshick. Momentum contrast for unsupervised visual representation learning. In *Proceedings of the IEEE/CVF conference on computer vision and pattern recognition*, pp. 9729–9738, 2020.
- Kaiming He, Xinlei Chen, Saining Xie, Yanghao Li, Piotr Dollár, and Ross Girshick. Masked autoencoders are scalable vision learners. In *Proceedings of the IEEE/CVF Conference on Computer Vision and Pattern Recognition*, pp. 16000–16009, 2022.
- Peter Henderson, Xuechen Li, Dan Jurafsky, Tatsunori Hashimoto, Mark A Lemley, and Percy Liang. Foundation models and fair use. *arXiv preprint arXiv:2303.15715*, 2023.
- Richard Zou Horace He. functorch: Jax-like composable function transforms for pytorch. <https://github.com/pytorch/functorch>, 2021.
- Alyssa Huang, Peihan Liu, Ryumei Nakada, Linjun Zhang, and Wanrong Zhang. Safeguarding data in multimodal ai: A differentially private approach to clip training. *arXiv preprint arXiv:2306.08173*, 2023.
- Sergey Ioffe and Christian Szegedy. Batch normalization: Accelerating deep network training by reducing internal covariate shift. In *International conference on machine learning*, pp. 448–456. pmlr, 2015.
- Samy Jelassi, Michael Sander, and Yuanzhi Li. Vision transformers provably learn spatial structure. *Advances in Neural Information Processing Systems*, 35:37822–37836, 2022.
- Hirokatsu Kataoka, Kazushige Okayasu, Asato Matsumoto, Eisuke Yamagata, Ryosuke Yamada, Nakamasa Inoue, Akio Nakamura, and Yutaka Satoh. Pre-training without natural images. In *Proceedings of the Asian Conference on Computer Vision*, 2020.
- Diederik P Kingma and Jimmy Ba. Adam: A method for stochastic optimization. *arXiv preprint arXiv:1412.6980*, 2014.
- Alex Krizhevsky, Geoffrey Hinton, et al. Learning multiple layers of features from tiny images. 2009.
- Alex Krizhevsky, Ilya Sutskever, and Geoffrey E Hinton. Imagenet classification with deep convolutional neural networks. *Communications of the ACM*, 60(6):84–90, 2017.

- Alexey Kurakin, Shuang Song, Steve Chien, Roxana Geambasu, Andreas Terzis, and Abhradeep Thakurta. Toward training at imagenet scale with differential privacy. *arXiv preprint arXiv:2201.12328*, 2022.
- Xuechen Li, Florian Tramer, Percy Liang, and Tatsunori Hashimoto. Large language models can be strong differentially private learners. In *International Conference on Learning Representations*, 2022a. URL <https://openreview.net/forum?id=bVuP3ltATMz>.
- Yanhao Li, Haoqi Fan, Ronghang Hu, Christoph Feichtenhofer, and Kaiming He. Scaling language-image pre-training via masking. *arXiv preprint arXiv:2212.00794*, 2022b.
- Zhuohan Li, Eric Wallace, Sheng Shen, Kevin Lin, Kurt Keutzer, Dan Klein, and Joey Gonzalez. Train big, then compress: Rethinking model size for efficient training and inference of transformers. In *International Conference on machine learning*, pp. 5958–5968. PMLR, 2020.
- Guosheng Lin, Anton Milan, Chunhua Shen, and Ian Reid. Refinenet: Multi-path refinement networks for high-resolution semantic segmentation. In *Proceedings of the IEEE conference on computer vision and pattern recognition*, pp. 1925–1934, 2017.
- Tsung-Yi Lin, Michael Maire, Serge Belongie, James Hays, Pietro Perona, Deva Ramanan, Piotr Dollár, and C Lawrence Zitnick. Microsoft coco: Common objects in context. In *Computer Vision—ECCV 2014: 13th European Conference, Zurich, Switzerland, September 6–12, 2014, Proceedings, Part V 13*, pp. 740–755. Springer, 2014.
- Ilya Loshchilov and Frank Hutter. Decoupled weight decay regularization. *arXiv preprint arXiv:1711.05101*, 2017.
- Subhansu Maji, Esa Rahtu, Juho Kannala, Matthew Blaschko, and Andrea Vedaldi. Fine-grained visual classification of aircraft. *arXiv preprint arXiv:1306.5151*, 2013.
- Casey Meehan, Florian Bordes, Pascal Vincent, Kamalika Chaudhuri, and Chuan Guo. Do ssl models have déjà vu? a case of unintended memorization in self-supervised learning. *arXiv e-prints*, pp. arXiv–2304, 2023.
- Ilya Mironov. Renyi differential privacy. In *2017 IEEE 30th computer security foundations symposium (CSF)*, pp. 263–275. IEEE, 2017.
- Ilya Mironov, Kunal Talwar, and Li Zhang. R\`enyi differential privacy of the sampled gaussian mechanism. *arXiv preprint arXiv:1908.10530*, 2019.
- Norman Mu, Alexander Kirillov, David Wagner, and Saining Xie. Slip: Self-supervision meets language-image pre-training. In *Computer Vision—ECCV 2022: 17th European Conference, Tel Aviv, Israel, October 23–27, 2022, Proceedings, Part XXVI*, pp. 529–544. Springer, 2022.
- Adam Paszke, Sam Gross, Soumith Chintala, Gregory Chanan, Edward Yang, Zachary DeVito, Zeming Lin, Alban Desmaison, Luca Antiga, and Adam Lerer. Automatic differentiation in pytorch. 2017.
- Alec Radford, Jong Wook Kim, Chris Hallacy, Aditya Ramesh, Gabriel Goh, Sandhini Agarwal, Girish Sastry, Amanda Askell, Pamela Mishkin, Jack Clark, et al. Learning transferable visual models from natural language supervision. In *International conference on machine learning*, pp. 8748–8763. PMLR, 2021.
- Alfréd Rényi et al. On measures of entropy and information. In *Proceedings of the fourth Berkeley symposium on mathematical statistics and probability*, volume 1. Berkeley, California, USA, 1961.
- Pierre H Richemond, Jean-Bastien Grill, Florent Alché, Corentin Tallec, Florian Strub, Andrew Brock, Samuel Smith, Soham De, Razvan Pascanu, Bilal Piot, et al. Byol works even without batch statistics. *arXiv preprint arXiv:2010.10241*, 2020.
- Tom Sander, Pierre Stock, and Alexandre Sablayrolles. Tan without a burn: Scaling laws of dp-sgd. *arXiv preprint arXiv:2210.03403*, 2022.

- Christoph Schuhmann, Richard Vencu, Romain Beaumont, Robert Kaczmarczyk, Clayton Mullis, Aarush Katta, Theo Coombes, Jenia Jitsev, and Aran Komatsuzaki. Laion-400m: Open dataset of clip-filtered 400 million image-text pairs. *arXiv preprint arXiv:2111.02114*, 2021.
- Christoph Schuhmann, Romain Beaumont, Richard Vencu, Cade Gordon, Ross Wightman, Mehdi Cherti, Theo Coombes, Aarush Katta, Clayton Mullis, Mitchell Wortsman, et al. Laion-5b: An open large-scale dataset for training next generation image-text models. *Advances in Neural Information Processing Systems*, 35:25278–25294, 2022.
- Naresh Sharma and Naqeeb Ahmad Warsi. Fundamental bound on the reliability of quantum information transmission. *Physical review letters*, 110(8):080501, 2013.
- Shuang Song, Kamalika Chaudhuri, and Anand D Sarwate. Stochastic gradient descent with differentially private updates. In *2013 IEEE global conference on signal and information processing*, pp. 245–248. IEEE, 2013.
- Hugo Touvron, Thibaut Lavril, Gautier Izacard, Xavier Martinet, Marie-Anne Lachaux, Timothée Lacroix, Baptiste Rozière, Naman Goyal, Eric Hambro, Faisal Azhar, et al. Llama: Open and efficient foundation language models. *arXiv preprint arXiv:2302.13971*, 2023.
- Florian Tramer and Dan Boneh. Differentially private learning needs better features (or much more data). *arXiv preprint arXiv:2011.11660*, 2020.
- Grant Van Horn, Elijah Cole, Sara Beery, Kimberly Wilber, Serge Belongie, and Oisín Mac Aodha. Benchmarking representation learning for natural world image collections. In *Proceedings of the IEEE/CVF conference on computer vision and pattern recognition*, pp. 12884–12893, 2021.
- Yuxin Wu, Alexander Kirillov, Francisco Massa, Wan-Yen Lo, and Ross Girshick. Detectron2. <https://github.com/facebookresearch/detectron2>, 2019.
- Tete Xiao, Yingcheng Liu, Bolei Zhou, Yuning Jiang, and Jian Sun. Unified perceptual parsing for scene understanding. In *Proceedings of the European conference on computer vision (ECCV)*, pp. 418–434, 2018.
- Zhenda Xie, Zheng Zhang, Yue Cao, Yutong Lin, Jianmin Bao, Zhuliang Yao, Qi Dai, and Han Hu. Simmim: A simple framework for masked image modeling. In *Proceedings of the IEEE/CVF Conference on Computer Vision and Pattern Recognition*, pp. 9653–9663, 2022.
- Yang You, Igor Gitman, and Boris Ginsburg. Large batch training of convolutional networks. *arXiv preprint arXiv:1708.03888*, 2017.
- Ashkan Yousefpour, Igor Shilov, Alexandre Sablayrolles, Davide Testuggine, Karthik Prasad, Mani Malek, John Nguyen, Sayan Ghosh, Akash Bharadwaj, Jessica Zhao, et al. Opacus: User-friendly differential privacy library in pytorch. *arXiv preprint arXiv:2109.12298*, 2021.
- Da Yu, Saurabh Naik, Arturs Backurs, Sivakanth Gopi, Huseyin A Inan, Gautam Kamath, Janardhan Kulkarni, Yin Tat Lee, Andre Manoel, Lukas Wutschitz, et al. Differentially private fine-tuning of language models. *arXiv preprint arXiv:2110.06500*, 2021.
- Jure Zbontar, Li Jing, Ishan Misra, Yann LeCun, and Stéphane Deny. Barlow twins: Self-supervised learning via redundancy reduction. In *International Conference on Machine Learning*, pp. 12310–12320. PMLR, 2021.
- Bolei Zhou, Agata Lapedriza, Jianxiong Xiao, Antonio Torralba, and Aude Oliva. Learning deep features for scene recognition using places database. *Advances in neural information processing systems*, 27, 2014.
- Bolei Zhou, Hang Zhao, Xavier Puig, Tete Xiao, Sanja Fidler, Adela Barriuso, and Antonio Torralba. Semantic understanding of scenes through the ade20k dataset. *International Journal of Computer Vision*, 127:302–321, 2019.

## A IMPLEMENTATION AND EVALUATION DETAILS

In this section, we provide implementation details for training and evaluating (*Syn*)-*ViP*, *ViP*, as well as other existing methods.

### A.1 DETAILS FOR MAE MODEL

In Table 4, we provide details for backbones of MAE model with different model sizes. Both MAE-Large and MAE-Base encoders are constructed following the identical setup described in He et al. (2022).

Table 4: Details of MAE backbone variants used in *ViP*.

| <i>ViP</i> model | MAE Backbone | Encoder depth | Encoder width | Decoder depth | Decoder width | # parameters |
|------------------|--------------|---------------|---------------|---------------|---------------|--------------|
| <i>ViP-Nano</i>  | MAE-Nano     | 12            | 192           | 4             | 512           | 18.6M        |
| <i>ViP-Tiny</i>  | MAE-Tiny     | 12            | 384           | 4             | 512           | 34.8M        |
| <i>ViP-Small</i> | MAE-Small    | 12            | 576           | 4             | 512           | 61.6M        |
| <i>ViP-Base</i>  | MAE-Base     | 12            | 768           | 4             | 512           | 99.0M        |
| <i>ViP-Large</i> | MAE-Large    | 24            | 1024          | 4             | 512           | 233.3M       |

### A.2 DETAILS FOR *ViP* PRE-TRAINING

For (*Syn*)-*ViP* pre-training, we follow the training setup outlined in (He et al., 2022): we apply the training parameters specified in Table 8 of He et al. (2022) and pre-train pre-train (*Syn*)-*ViP* on the S21k dataset developed in Baradad et al. (2022), which comprises of 1,300,000 training samples, for a total of 1,000 epochs. Our (*Syn*)-*ViP* pre-training applies the self-supervised MAE training methodology and does not use the label information available in the S21k dataset.

We now present details for differentially private *ViP* pre-training. As mentioned in Section 3, we first initialize the model weights with (*Syn*)-*ViP* pre-trained on S21k dataset. Then we apply DP-AdamW<sup>6</sup>. See the table below for training hyperparameters.

| Model           | lr ( $\eta$ )        | warmup iterations | wd ( $\lambda$ ) | $(\beta_1, \beta_2)$ | epsilon ( $\epsilon$ ) | lr decay |
|-----------------|----------------------|-------------------|------------------|----------------------|------------------------|----------|
| <i>ViP-Base</i> | $3.84 \cdot 10^{-4}$ | 1,000             | 0.005            | (0.9, 0.95)          | $10^{-8}$              | cosine   |

For masking in the MAE training, we follow the random masking strategy and masking ratio of 75% in He et al. (2022) for both (*Syn*)-*ViP* pre-training and *ViP* pre-training. The process of executing each iteration of DP-AdamW for training the *ViP-Base* model takes approximately 25 seconds when utilizing 48 A100 (40GB) GPUs. Each epoch of the (*Syn*)-*ViP-Base* model’s training process takes roughly 90 seconds to complete with 48 A100 (40GB) GPUs.

### A.3 DETAILS FOR DOWNSTREAM CLASSIFICATION TASK

**Linear probing.** We follow the training setup in He et al. (2022): we apply BatchNorm (Ioffe & Szegedy, 2015) before the last linear layer, and use the LARS (You et al., 2017) optimizer. We choose the base learning rate  $\text{blr} \in \{0.1, 0.05, 0.01\}$ , batch size  $B = 16, 384$ , weight decay  $\lambda = 0.0$ . We set warmup epoch as 10, and total training epoch as 90. We use the RandomResizedCrop and RandomHorizontalFlip augmentations.

**Few-shot fine-tuning.** For vision transformer based architectures, we apply the AdamW optimizer with learning rate of  $\text{lr} \in \{3 \cdot 10^{-3}, 3 \cdot 10^{-4}, 3 \cdot 10^{-5}\}$  and set weight decay as 0.05. For convolutional neural networks (AlexNet, ResNet used in SimCLR), we apply the SGD optimizer because it consistently outperforms AdamW. We select learning rate  $\text{lr} \in \{1 \cdot 10^{-2}, 1 \cdot 10^{-3}, 1 \cdot 10^{-4}\}$ , while setting the momentum as 0.9 and the weight decay as 0.0. For all models we apply the cosine

<sup>6</sup>A variant of the standard DP-SGD — we first compute the noisy clipped stochastic gradient described in equation 3, then apply one step update of AdamW (Loshchilov & Hutter, 2017) using the estimated gradient.

learning rate decay, and use 10 warm-up epochs and fine-tune with 200 total epochs. We apply AutoAugment (Cubuk et al., 2018) for data augmentation.

#### A.4 DETAILS FOR DOWNSTREAM SEGMENTATION AND DETECTION TASKS

**COCO object detection and segmentation.** We fine-tune the pre-trained (*Syn*)-ViP and ViP on COCO with the Detectron2 package (Wu et al., 2019). We apply the pre-trained (*Syn*)-ViP-Base and ViP-Base as the ViT initializations for the detection and segmentation tasks, and apply the default hyperparameter config in Detectron2 for ViTDet-Base.

**ADE20K semantic segmentation.** We follow the setup described in He et al. (2022) on evaluating pre-trained MAE models for semantic segmentation. We apply the UPerNet (Xiao et al., 2018) and perform fine-tuning for 100 epochs with a batch size of 16.

#### A.5 DETAILS FOR DIFFERENTIALLY PRIVATE FINE-TUNING ON IMAGENET

We use the pre-trained encoders of (*Syn*)-ViP and ViP and apply DP-AdamW for DP end-to-end fine-tuning. The details for parameters in DP-AdamW can be found in the following table.

| Model                              | sampling ratio $q$ | noise $\sigma$ | iterations $T$ | lr                   | wd    |
|------------------------------------|--------------------|----------------|----------------|----------------------|-------|
| ViP-Base / ( <i>Syn</i> )-ViP-Base | 262, 144/ $n$      | 5.6            | 1,500          | $1.02 \cdot 10^{-3}$ | 0.005 |

We use 50 iterations for learning rate warm-up, and then keep the learning rate constant afterwards. For selecting parameters not presented in the aforementioned table, we adopt the default configuration of AdamW in PyTorch (Paszke et al., 2017). The fine-tuned model satisfies  $(8, 8 \cdot 10^{-7})$ -DP on the ImageNet-1K dataset in addition to the LAION233M dataset.

#### A.6 DETAILS FOR FIGURE 1

For the linear probing results, we present the performance of the ViP-Large model, with the summarized results shown in the last row of Table 4. Regarding the detection and segmentation results, we utilize the ViP-Base model as the ViT backbone, and the corresponding outcomes can be found in Table 5.

## B ADDITIONAL EXPERIMENTAL RESULTS

In this section, we provide additional experimental results on evaluating (*Syn*)-*ViP*, *ViP*, as well as other existing methods.

### B.1 SEGMENTATION AND DETECTION EVALUATIONS OF (SYN)-VIP/ViP

We summarize the results for object detection and segmentation in Table 5. Training details can be found in Appendix A.4.

Table 5: Evaluation of our DP models ((*Syn*)-*ViP*, *ViP*) as well as existing non-private baselines on COCO object detection/segmentation and ADE20K semantic segmentation.

| Model                        | DP? | COCO              |                    | ADE20K |
|------------------------------|-----|-------------------|--------------------|--------|
|                              |     | AP <sup>box</sup> | AP <sup>mask</sup> | mIoU   |
| SimCLR (Chen et al., 2020a)  | ✗   | 37.9              | 33.3               | -      |
| Mask R-CNN (He et al., 2017) | ✗   | 40.0              | 37.1               | -      |
| RefineNet (Lin et al., 2017) | ✗   | -                 | -                  | 40.7   |
| MAE (He et al., 2022)        | ✗   | 50.3              | 44.9               | 48.1   |
| <i>(Syn)</i> - <i>ViP</i>    | ✓   | 45.0              | 40.1               | 38.8   |
| <i>ViP</i>                   | ✓   | 45.2              | 40.4               | 40.1   |

### B.2 ADDITIONAL EXPERIMENTS ON VIP PRE-TRAINING

In Figure 6, we plot the training loss v.s. number of training steps for *ViP* training *without* (*Syn*)-*ViP* initialization. Compared to the results in Figure 4a, when pre-training from scratch with DP-AdamW, larger models do not converge faster than smaller ones. These results further demonstrate the effectiveness of synthetic pre-training for unlocking DP-SGD training of larger vision models.

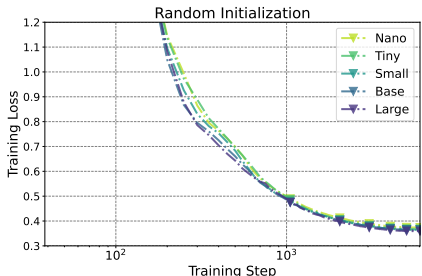

Figure 6: Training loss of different model sizes. (with random initialization).

### B.3 DP FINE-TUNING VIP ON IMAGENET-1K

Thus far, our main emphasis has been on evaluating DP pre-trained *ViP* through *non-private* linear probing or fine-tuning on downstream tasks. For certain use cases, the downstream task training set may be privacy-sensitive as well and DP fine-tuning is required. We simulate such a scenario by fine-tuning the privately pre-trained *ViP* model<sup>7</sup> on ImageNet-1K with DP-SGD. As a result, the fine-tuned model satisfies  $(8, 8 \cdot 10^{-7})$ -DP on the ImageNet-1K dataset in addition to the LAION233M dataset. We compare against prior works on training DP ImageNet models without pre-training (Kurakin et al., 2022; De et al., 2022; Sander et al., 2022); results are summarized in Table 6.

By utilizing our pre-trained *ViP* as an initialization, we observe an improvement in top-1 accuracy of more than 10% compared to the previous SOTA (Sander et al., 2022), demonstrating the efficacy of our DP pre-training recipe.

<sup>7</sup>*ViP*-Base pre-trained on LAION233 shown in the last row of Table 1.



Table 6: DP fine-tuning evaluation on ImageNet-1K. We compare (Syn)-ViP and ViP with existing DP training methods (DP-ResNet-18, DP-NFNet, and TAN) on ImageNet-1K.

| Model                               | $(\epsilon, \delta)$ -DP | Top-1 Accuracy         |
|-------------------------------------|--------------------------|------------------------|
| DP-ResNet-18 (Kurakin et al., 2022) | $(13.2, 10^{-6})$        | 6.2%                   |
| DP-NFNet (De et al., 2022)          | $(8, 8 \cdot 10^{-7})$   | 32.4%                  |
| TAN (Sander et al., 2022)           | $(8, 8 \cdot 10^{-7})$   | 39.2%                  |
| (Syn)-ViP                           | $(8, 8 \cdot 10^{-7})$   | 48.9% $\pm$ 0.2        |
| ViP                                 | $(8, 8 \cdot 10^{-7})$   | <b>50.3%</b> $\pm$ 0.3 |

#### B.4 ADDITIONAL EXPERIMENTS ON THE CLASSIFICATION TASK

**Comparison with non-private MAE.** To gain a better understanding of the gap between non-private training and private training, we use the same synthetic pre-trained model as initialization and perform DP-AdamW training on LAION233M with  $\sigma = 0.0^8$ . We keep most of the training parameters the same except for setting the sampling ratio to  $q = 4096/n$  and the number of iterations  $T = 60,000^9$ . We then evaluate the linear probing (few-shot fine-tuning) performance of the trained model and provide the results in Table 7 (Table 8).

For linear probing, our ViP model closes more than half the gap between the (Syn)-ViP model and the non-private MAE model. With a more refined training recipe, it is plausible that the gap can be reduced even further, allowing DP-trained foundation vision models to rival non-privately trained ones on certain downstream tasks. In the context of few-shot fine-tuning, a comparison between private learning and the non-private MAE model reveals considerable potential for improvement in the private learning approach.

**Comparison with ViP trained on de-duplicated LAION-2B.** Recent work has demonstrated that there exist duplicated samples in the LAION dataset, which poses copyright and privacy challenges for foundation models trained on LAION. Therefore, we also pre-train our proposed ViP model on a de-duplicated subset of LAION-2B (Schuhmann et al., 2022), denoted by Dedup-LAION-245M, which consists of a similar number of training samples (245 million) as the one we mainly consider in this work. We summarize the linear probing performance of the ViP pre-trained on Dedup-LAION-245M in Table 7. We find the ViP model pre-trained on the de-duplicated LAION achieves similar performance as the one trained on LAION-400M (Schuhmann et al., 2021).

Table 7: Linear probing evaluation on downstream classification. We compare ViP and (Syn)-ViP with (non-private) MAE (He et al., 2022).

| Model             | Pre-train dataset | DP? | SSL? | ImageNet-1K <sup>†</sup> | Places-365 | Places-205 | iNat-2021 |
|-------------------|-------------------|-----|------|--------------------------|------------|------------|-----------|
| (non-private) MAE | LAION-233M        | ✗   | ✓    | 60.5%                    | 48.3%      | 51.8%      | 38.5%     |
| (Syn)-ViP         | LAION-233M        | ✓   | ✓    | 49.8%                    | 43.2%      | 45.8%      | 32.4%     |
| ViP               | LAION-233M        | ✓   | ✓    | 55.7%                    | 46.1%      | 48.5%      | 38.1%     |
| ViP               | Dedup-LAION-245M  | ✓   | ✓    | 55.5%                    | 46.3%      | 48.1%      | 38.0%     |

Table 8: Fine-tuning evaluation on few-shot downstream classification. We compare ViP and (Syn)-ViP with (non-private) MAE (He et al., 2022).

| Model             | Aircraft      |               |               |               | Caltech-101   |               |               | CIFAR-100     |               |
|-------------------|---------------|---------------|---------------|---------------|---------------|---------------|---------------|---------------|---------------|
|                   | 10-shot       | 20-shot       | 30-shot       | 5-shot        | 10-shot       | 30-shot       | 5-shot        | 10-shot       | 30-shot       |
| (non-private) MAE | 36.78%        | 56.82%        | 66.20%        | 72.93%        | 84.50%        | 92.78%        | 34.38%        | 47.98%        | 62.88%        |
| (Syn)-ViP         | 21.79%        | 46.85%        | 58.45%        | 60.51%        | 76.21%        | 88.48%        | 27.62%        | 38.96%        | 55.84%        |
| ViP               | <b>31.62%</b> | <b>53.05%</b> | <b>64.26%</b> | <b>68.05%</b> | <b>79.03%</b> | <b>88.90%</b> | <b>30.73%</b> | <b>40.95%</b> | <b>57.52%</b> |

<sup>8</sup>In this case, the  $\epsilon = +\infty$  for the  $(\epsilon, \delta)$ -DP.

<sup>9</sup>While the trained model may not necessarily achieve optimal performance, our main purpose is to present a non-private model that follows a similar training setup, with the exception of setting the noise to zero. This allows us to compare its performance to the private model.

**Linear probing evaluation of ViP with different model sizes.** We study the scaling behavior of ViP and (Syn)-ViP through linear probing. As shown in Table 10, we compare the performance of ViP and (Syn)-ViP with different model sizes. The performance of ViP consistently improves across all datasets as the model size increases. In contrast, increasing the model size from MAE-Base to MAE-Large results in less than 1% improvement in top-1 accuracy for (Syn)-ViP. These findings further underscore the effectiveness of our proposed ViP training recipe for scaling up model size in private pre-training.

Table 9: Linear probing evaluation of *ViP-LAION* with different privacy budget on ImageNet-1k classification. We vary the privacy budget epsilon ( $\epsilon$ ) from 2.0 to  $+\infty$ , where our default privacy budget is  $\epsilon = 8.0$  and we use  $\epsilon = +\infty$  to denote the non-private MAE model.

| Model            | Downstream dataset | $\epsilon = 2.0$ | $\epsilon = 4.0$ | $\epsilon = 8.0$ | $\epsilon = +\infty$ |
|------------------|--------------------|------------------|------------------|------------------|----------------------|
| <i>ViP-LAION</i> | ImageNet-1k        | 51.4%            | 53.8%            | 55.7%            | 60.5%                |

Table 10: Additional linear probing evaluation on downstream classification (ViP with different model sizes).

| Model              | # parameters | Backbone  | ImageNet-1K  | Places-365   | Places-205   | iNat-2021    |
|--------------------|--------------|-----------|--------------|--------------|--------------|--------------|
| <i>(Syn)-ViP-S</i> | 61.6M        | MAE-Small | 46.0%        | 40.9%        | 43.2%        | 28.3%        |
| <i>(Syn)-ViP-B</i> | 99.0M        | MAE-Base  | 49.8%        | 43.2%        | 45.8%        | 32.4%        |
| <i>(Syn)-ViP-L</i> | 233.3M       | MAE-Large | 50.2%        | 43.3%        | 46.5%        | 32.7%        |
| <i>ViP-S</i>       | 61.6M        | MAE-Small | 49.6%        | 42.4%        | 44.7%        | 30.0%        |
| <i>ViP-B</i>       | 99.0M        | MAE-Base  | 55.7%        | 46.1%        | 48.5%        | 38.1%        |
| <i>ViP-L</i>       | 233.3M       | MAE-Large | <b>58.0%</b> | <b>48.5%</b> | <b>50.8%</b> | <b>40.6%</b> |

## B.5 ViP ABLATION EXPERIMENTS

We study the effect of MAE-decoder depth and MAE-masking ratio in *ViP* pre-training, and evaluate different models with linear probing on ImageNet-1K. We consider the *ViP-Base* setting and the results are summarized in Table 11.

Table 11: Ablation studies on the effect of decoder depth and masking ratio in MAE.

| Model                | decoder depth | masking ratio | ImageNet-1K |
|----------------------|---------------|---------------|-------------|
| <i>ViP</i> (default) | 4             | 0.75          | 55.7%       |
| <i>ViP</i>           | 1             | 0.75          | 43.4%       |
| <i>ViP</i>           | 2             | 0.75          | 51.7%       |
| <i>ViP</i>           | 8             | 0.75          | 50.1%       |
| <i>ViP</i>           | 4             | 0.25          | 53.5%       |
| <i>ViP</i>           | 4             | 0.5           | 54.7%       |
